# Supplementary material for: Preparing children for climate-related disasters
Source: PubMed Central journal article supplement — BMJ Paediatr Open. 2020 Oct 9;4(1):e000833. doi: 10.1136/bmjpo-2020-000833 (PMC7549485; doi:10.1136/bmjpo-2020-000833), 2020-10-09
Supplement: bmjpo-2020-000833.draft_revisions.pdf [file bmjpo-2020-000833.draft_revisions.pdf]

# BMJ Paediatrics Open

BMJ Paediatrics Open is committed to open peer review. As part of this commitment we make the peer review history of every article we publish publicly available.

When an article is published we post the peer reviewers' comments and the authors' responses online. We also post the versions of the paper that were used during peer review. These are the versions that the peer review comments apply to.

The versions of the paper that follow are the versions that were submitted during the peer review process. They are not the versions of record or the final published versions. They should not be cited or distributed as the published version of this manuscript.

BMJ Paediatrics Open is an open access journal and the full, final, typeset and author-corrected version of record of the manuscript is available on our site with no access controls, subscription charges or pay-per-view fees (<http://bmjpaedsopen.bmj.com>).

If you have any questions on BMJ Paediatrics Open's open peer review process please email [info.bmjpo@bmj.com](mailto:info.bmjpo@bmj.com)

# BMJ Paediatrics Open

## Preparing children for climate-related disasters during a COVID-19 pandemic

|                               |                                                                                                                                                                                                                             |
|-------------------------------|-----------------------------------------------------------------------------------------------------------------------------------------------------------------------------------------------------------------------------|
| Journal:                      | <i>BMJ Paediatrics Open</i>                                                                                                                                                                                                 |
| Manuscript ID                 | bmjpo-2020-000833                                                                                                                                                                                                           |
| Article Type:                 | Editorial                                                                                                                                                                                                                   |
| Date Submitted by the Author: | 11-Aug-2020                                                                                                                                                                                                                 |
| Complete List of Authors:     | Seddighi, Hamed; University of Social Welfare and Rehabilitation Science,<br>Yousefzadeh, Sepideh; RUG, Campus Friesland<br>Lopez, Monica; RUG<br>Sajjadi, Homeira; University of Social Welfare and Rehabilitation Science |
| Keywords:                     | Child Abuse, Health services research                                                                                                                                                                                       |
|                               |                                                                                                                                                                                                                             |

SCHOLARONE™  
Manuscripts

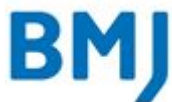

I, the Submitting Author has the right to grant and does grant on behalf of all authors of the Work (as defined in the below author licence), an exclusive licence and/or a non-exclusive licence for contributions from authors who are: i) UK Crown employees; ii) where BMJ has agreed a CC-BY licence shall apply, and/or iii) in accordance with the terms applicable for US Federal Government officers or employees acting as part of their official duties; on a worldwide, perpetual, irrevocable, royalty-free basis to BMJ Publishing Group Ltd ("BMJ") its licensees and where the relevant Journal is co-owned by BMJ to the co-owners of the Journal, to publish the Work in this journal and any other BMJ products and to exploit all rights, as set out in our [licence](#).

The Submitting Author accepts and understands that any supply made under these terms is made by BMJ to the Submitting Author unless you are acting as an employee on behalf of your employer or a postgraduate student of an affiliated institution which is paying any applicable article publishing charge ("APC") for Open Access articles. Where the Submitting Author wishes to make the Work available on an Open Access basis (and intends to pay the relevant APC), the terms of reuse of such Open Access shall be governed by a Creative Commons licence – details of these licences and which [Creative Commons](#) licence will apply to this Work are set out in our licence referred to above.

Other than as permitted in any relevant BMJ Author's Self Archiving Policies, I confirm this Work has not been accepted for publication elsewhere, is not being considered for publication elsewhere and does not duplicate material already published. I confirm all authors consent to publication of this Work and authorise the granting of this licence.

## How to prepare children for climate-related disasters in time of COVID\_19 pandemic

Hamed Seddighi<sup>1\*</sup>, Sepideh Yousefzadeh<sup>3</sup>, Mónica López López<sup>4</sup>, Homeira Sajjadi<sup>2</sup>

<sup>1</sup> Student Research Committee, University of Social Welfare and Rehabilitation Sciences, Tehran, Iran, [Hseddighi@gmail.com](mailto:Hseddighi@gmail.com)

<sup>3</sup> Population Research Centre, Faculty of Spatial Sciences, University of Groningen, Groningen, the Netherlands, [s.yousefzadeh@rug.nl](mailto:s.yousefzadeh@rug.nl)

<sup>4</sup> Faculty of Behavioural and Social Sciences, University of Groningen, Groningen, the Netherlands, [m.lopez.lopez@rug.nl](mailto:m.lopez.lopez@rug.nl)

<sup>2</sup> Social Determinants of Health Research Center, University of Social Welfare and Rehabilitation Sciences, Tehran, Iran, [safaneh\\_s@yahoo.com](mailto:safaneh_s@yahoo.com)

### Children, vulnerability and disasters

Anthropogenic climate change has led to more frequent natural disasters affecting more people<sup>1 2</sup>. Climate-related disasters such as floods, storms, droughts, and heat waves accounted 91% of total disasters between 1998 and 2017. Disasters are classified into geophysical, hydrological, climatological, meteorological, biological, and technological based on their causes<sup>3,4</sup>. According to the Centre for Research on the Epidemiology of Disasters<sup>5</sup>, a disaster is a “situation or event which overwhelms local capacity, necessitating a request at the national or international level for external assistance; an unforeseen and often sudden event that causes great damage, destruction and human suffering”. Climate-related disasters such as floods, storms, droughts, and heat waves accounted for 91% of total disasters between 1998 and 2017.

Children are one of the most vulnerable groups In situations of climate-related disasters and disasters have different impacts on children including fatalities, injuries, child trafficking, child labor, separation and child abuse in different forms<sup>6,7</sup>. United Nations Convention on the rights of the children, defined child as anyone under the age of 18<sup>8</sup>. Disasters affect different dimensions of children’s health and wellbeing both directly and indirectly. Children's physical health is in danger as they may be injured or killed immediately during or after disasters due to trauma, malnourishment, diseases and inadequate access to medical care<sup>6,9</sup>. Disasters also can lead to mental health problems in children<sup>6</sup>.

Reducing vulnerability is a way to protect children in disasters<sup>10</sup>. Susceptibility of children to injury and their dependency to others for lifesaving, livelihood, decision making, and emotional support results in their vulnerability<sup>10</sup>. Children are more likely to suffer from exposure to traumatic events because of their circumstances such as physical, physiological and mental development<sup>10 11</sup>. They are more likely vulnerable to challenges like malnutrition, dehydration, and exhaustion compared to adult<sup>10</sup>. As such, they

1  
2  
3 need more protection before, during and after disasters. Such protections may be even more crucial for  
4 children who are more vulnerable by virtue of their age (i.e. infants), living conditions (e.g. bad  
5 infrastructure or lack of family support), ethnicity, disabilities, chronic diseases or preconditions. Attention  
6 to children before disasters should be an integral part of disaster's preparedness and will reduce their  
7 vulnerability<sup>10</sup>.  
8  
9  
10

### 11 **Children's preparedness for disasters**

12  
13  
14 Preparedness is "the knowledge and capacities developed by governments, response and recovery  
15 organizations, communities and individuals to effectively anticipate, respond to and recover from the  
16 impacts of likely, imminent or current disasters"<sup>12</sup>. Behavioral changes which lead to a child's preparedness  
17 for disasters depend more than anything upon two factors: increased knowledge and skills & risk  
18 perception.  
19  
20  
21

22  
23 The first factor in shaping children's behavior and response to disaster is knowledge and education<sup>13</sup>.  
24 Disaster education plays a major role in enhancing the awareness of children about disasters<sup>13</sup>. With an  
25 increase in children's awareness on disasters, they can share their knowledge with adults and it may result  
26 in adults' preparedness as well<sup>14</sup>. Disaster education for children can be conducted in schools, kindergartens,  
27 child welfare centers, or other child service centers. Schools play a critical role in disaster risk reduction  
28 because they facilitate the process of education of children on disaster risk reduction<sup>15</sup>. By utilizing  
29 appropriate policy framework, skilled teachers, textbook and curriculum for learning as well as peer  
30 education, schools provide an ideal space for children disaster's preparedness<sup>15</sup>.  
31  
32  
33  
34  
35

36 The second factor related to children's preparedness is risk perceptions. Risk perceptions is defined as  
37 "beliefs about potential harm or the possibility of a loss. It is a subjective judgment that people make about  
38 the characteristics and severity of a risk"<sup>16</sup>. When a child perceived likelihood, susceptibility, and severity  
39 of a disaster (such as earthquake), then s/he would be able and willing to learn how to prepare<sup>16</sup>. For  
40 example, risk perception during COVID\_19 pandemics in the world was higher than any other hazard. So  
41 people actively explored and learned protective measures.  
42  
43  
44  
45

46 Before COVID-19 pandemic, there were many programs conducted for preparing children in many  
47 countries. For example, in Iran, children gained disasters' knowledge via their school textbooks. In addition,  
48 humanitarian and emergency organizations (e.g. Red Cross and Red Crescent Societies) in cooperation with  
49 Ministry of Education conducted various programs for children of different ages. For instance, children in  
50 kindergartens learned how to evacuate and seek shelter during an earthquake. They also became informed  
51 about emergency phone numbers they need to know in case of an emergency. They were provided with a  
52 special phone number to dial and listen to stories about safety. The International Red Crescent Society  
53  
54  
55  
56  
57  
58  
59  
60

(IRCS) held training programs in schools to acquaint children with first aid skills, emergency evacuation, emergency shelters, and emergency move. Every year, a week is specified for conducting earthquake drills in schools. Almost all emergency preparedness educational activities for children have been suspended due to COVID-19 in many countries including Iran since February 2020. But, an earthquake or any other disaster may happen every day at any spot on the earth. Below are some points proposed for preparing children during this time.

### **Preparing children in the time of COVID-19 pandemic**

In order to preparing children for climate-related disasters in the time of pandemics, we recommend that:

- 1- Disasters education for children has so far relied mostly on offline training with physical activities such as drills. During this pandemic, different innovative approaches have been applied to continue education in online formats. The same approaches could be applied for emergency preparedness. For example, virtual forums are appropriate alternatives to provide educations on different topics, e.g. first aid or preparedness for earthquakes, flood, and other disasters.
- 2- Creating required resources, especially interactive resources, for disaster preparedness is another way to prepare children in different languages. Countries according to their risk map (hazard-prone places) should produce relevant content and resources for children.
- 3- Increasing the children's risk perception with the help of media such as TV programs, video games, physical games, music, storytelling, and simulators.
- 4- Capacity building to train the people around the children including teachers, parents, the extended family members, nurses, school drivers, or care providers. Upon the shutdown of many centers, it is the best time to train people who work with children about disasters' preparedness. It can be very useful especially when COVID-19 threat has been removed.
- 5- Preparing marginalized children for disasters is vital. Intersection of childhood and racial and ethnic, social class, disability, gender, and residence inequalities increases vulnerability and therefore increases disasters' risk for children. One should note that entry points for intervention in such situation are social vulnerabilities.
- 6- An advocacy support by influential entities such as companies engaged in entertainment industry is required for raising the awareness of public and particularly the children about disasters' preparedness.

**Twitter:** @seedighi\_hamed,

1  
2  
3 **Contributors:** HS undertook planning, writing up and was responsible for the overall content; SY,  
4 MLL and HS provided content and writing of sections, HS provided content and editorial  
5 oversight.  
6

7 **Funding** The authors have not declared a specific grant for this research from any funding agency  
8 in the public, commercial or not-for-profit sectors.  
9

10 **Competing interests:** Not applicable.  
11

12 **Patient and public involvement:** Not applicable.  
13

14 **Patient consent for publication:** Not applicable.  
15  
16  
17  
18  
19  
20  
21  
22  
23  
24  
25  
26  
27  
28  
29  
30  
31  
32  
33  
34  
35  
36  
37  
38  
39  
40  
41  
42  
43  
44  
45  
46  
47  
48  
49  
50  
51  
52  
53  
54  
55  
56  
57  
58  
59  
60

## References

- .1 Seddighi H. Trust in Humanitarian Aid From the Earthquake in 2017 to COVID-19 in Iran: A Policy Analysis. *Disaster Medicine and Public Health Preparedness*. 2020:1-4.
- .2 WMO. *WMO Statement on the State of the Global Climate in 2018*. World Meteorological Organization;2019.
- .3 CRED. Disaster General Classification. <https://www.emdat.be/classification>. Accessed 31 March, 2020.
- .4 Seddighi H. COVID-19 as a Natural Disaster: Focusing on Exposure and Vulnerability for Response. *Disaster Medicine and Public Health Preparedness*.1-4.
- .5 Wallemacq P. *Economic losses, poverty & disasters: 1998-2017*. Centre for Research on the Epidemiology of Disasters, CRED; 2018.
- .6 Kousky C. Impacts of natural disasters on children. *The Future of Children*. 2016:73-92.
- .7 Seddighi H, Salmani I, Javadi MH, Seddighi S. Child abuse in natural disasters and conflicts: a systematic review. *Trauma, Violence, & Abuse*.1524838019835973.
- .8 Unicef. Convention on the Rights of the Child. 1989.
- .9 Seddighi H, Sajjadi H, Salmani I. Child-Friendly Humanitarian Logistics in Natural Disasters: A Letter to the Editor. *Iranian Red Crescent Medical Journal*.21(8).
- .10 Hoffman S. Preparing for disaster: Protecting the most vulnerable in emergencies. *UC Davis L. Rev*. 2008;42:1491.
- .11 Swenson CC, Saylor CF, Powell MP, Stokes SJ, Foster KY, Belter RW. Impact of a natural disaster on preschool children: Adjustment 14 months after a hurricane. *American Journal of Orthopsychiatry*. 1996;66(1):122-130.
- .12 UNISDR U. Terminology on disaster risk reduction. *Geneva, Switzerland*. 2009.
- .13 Mermer G, Donmez RO, Daghan S. The evaluation of the education for earthquake preparation addressed to middle school students. *JPMA. The Journal of the Pakistan Medical Association*. 2018;68(12):1809-1815.
- .14 Sakurai A, Bisri M, Oda T, Oktari R, Murayama Y, Affan M. Exploring minimum essentials for sustainable school disaster preparedness: A case of elementary schools in Banda Aceh City, Indonesia. *International journal of disaster risk reduction*. 2018;29:73-83.
- .15 Bandecchi AE, Pazzi V, Morelli S, Valori L, Casagli N. Geo-hydrological and seismic risk awareness at school: Emergency preparedness and risk perception evaluation. *International Journal of Disaster Risk Reduction*. 2019:101280.
- .16 Darker C. Risk Perception. In: Gellman MD, Turner JR, eds. *Encyclopedia of Behavioral Medicine*. New York, NY: Springer New York; 2013:1689-1691.



# BMJ Paediatrics Open

## Preparing children for climate-related disasters

|                               |                                                                                                                                                                                                                             |
|-------------------------------|-----------------------------------------------------------------------------------------------------------------------------------------------------------------------------------------------------------------------------|
| Journal:                      | <i>BMJ Paediatrics Open</i>                                                                                                                                                                                                 |
| Manuscript ID                 | bmjpo-2020-000833.R1                                                                                                                                                                                                        |
| Article Type:                 | Editorial                                                                                                                                                                                                                   |
| Date Submitted by the Author: | 07-Sep-2020                                                                                                                                                                                                                 |
| Complete List of Authors:     | Seddighi, Hamed; University of Social Welfare and Rehabilitation Science,<br>Yousefzadeh, Sepideh; RUG, Campus Friesland<br>Lopez, Monica; RUG<br>Sajjadi, Homeira; University of Social Welfare and Rehabilitation Science |
| Keywords:                     | Child Abuse, Health services research, Adolescent Health, Information Technology                                                                                                                                            |
|                               |                                                                                                                                                                                                                             |

SCHOLARONE™  
Manuscripts

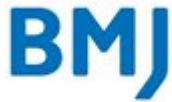

I, the Submitting Author has the right to grant and does grant on behalf of all authors of the Work (as defined in the below author licence), an exclusive licence and/or a non-exclusive licence for contributions from authors who are: i) UK Crown employees; ii) where BMJ has agreed a CC-BY licence shall apply, and/or iii) in accordance with the terms applicable for US Federal Government officers or employees acting as part of their official duties; on a worldwide, perpetual, irrevocable, royalty-free basis to BMJ Publishing Group Ltd ("BMJ") its licensees and where the relevant Journal is co-owned by BMJ to the co-owners of the Journal, to publish the Work in this journal and any other BMJ products and to exploit all rights, as set out in our [licence](#).

The Submitting Author accepts and understands that any supply made under these terms is made by BMJ to the Submitting Author unless you are acting as an employee on behalf of your employer or a postgraduate student of an affiliated institution which is paying any applicable article publishing charge ("APC") for Open Access articles. Where the Submitting Author wishes to make the Work available on an Open Access basis (and intends to pay the relevant APC), the terms of reuse of such Open Access shall be governed by a Creative Commons licence – details of these licences and which [Creative Commons](#) licence will apply to this Work are set out in our licence referred to above.

Other than as permitted in any relevant BMJ Author's Self Archiving Policies, I confirm this Work has not been accepted for publication elsewhere, is not being considered for publication elsewhere and does not duplicate material already published. I confirm all authors consent to publication of this Work and authorise the granting of this licence.

## Preparing children for climate-related disasters

Hamed Seddighi <sup>1\*</sup>, Sepideh Yousefzadeh<sup>2</sup>, Mónica López López<sup>3</sup>, Homeira Sajjadi <sup>4</sup>

<sup>1</sup> Student Research Committee, University of Social Welfare and Rehabilitation Sciences, Tehran, Iran, [Hseddighi@gmail.com](mailto:Hseddighi@gmail.com)

<sup>2</sup> Population Research Centre, Faculty of Spatial Sciences, University of Groningen, Groningen, the Netherlands, [s.yousefzadeh@rug.nl](mailto:s.yousefzadeh@rug.nl)

<sup>3</sup> Faculty of Behavioural and Social Sciences, University of Groningen, Groningen, the Netherlands, [m.lopez.lopez@rug.nl](mailto:m.lopez.lopez@rug.nl)

<sup>4</sup> Social Determinants of Health Research Center, University of Social Welfare and Rehabilitation Sciences, Tehran, Iran, [safaneh\\_s@yahoo.com](mailto:safaneh_s@yahoo.com)

**Corresponding author:** Hamed Seddighi, Iran, Tehran, University of Social Welfare and Rehabilitation Sciences, Kodakyar Ave., Daneshjo Blvd., 1985713871 (e-mail: [Hseddighi@gmail.com](mailto:Hseddighi@gmail.com) and [ha.seddighi@uswr.ac.ir](mailto:ha.seddighi@uswr.ac.ir)), Telefax: +983538213598

**Keywords:** Child, Safety, Climate Change, Disaster Planning

**Word counts:** 1798

### Children, vulnerability and disasters

Anthropogenic climate change has led to more frequent natural disasters affecting more people in the past few decades<sup>1,2</sup>. Climate-related disasters such as floods, storms, droughts, and heat waves accounted for 91% of total disasters between 1998 and 2017. Climate-related disasters are strongly coupled and act as dominos. For example, drought and heat wave occur together. Drought leads to dry soils and as a result, solar energy evaporation will end to increase surface warming and consequent increased evaporation rate<sup>3</sup>. Drought and heatwave will increase the risk of wildfires. Furthermore, sandstorms, haze, and water conflicts are other consequences of drought. Disasters are classified into geophysical, hydrological, climatological, meteorological, biological, and technological based on their causes<sup>4,5</sup>. According to the Centre for Research on the Epidemiology of Disaster<sup>6</sup>, a disaster is a “situation or event that overwhelms local capacity, necessitating a request at the national or international level for external assistance; an unforeseen and often sudden event that causes great damage, destruction and human suffering”.

Children are one of the most vulnerable groups in situations of climate-related disasters and disasters have different impacts on children including fatalities, injuries, child trafficking, child labor, separation, and child abuse in different forms<sup>7-9</sup>. Disasters affect different dimensions of children’s health and wellbeing both directly and indirectly. Children under five years experienced more diseases related to climate change than others<sup>10</sup>. Children's physical health is in danger as they may be injured or killed immediately during or after disasters due to trauma, malnourishment, diseases, and inadequate access to medical care<sup>7,11</sup>. Disasters also can lead to mental health problems in children, including depression, sleep disorders, phobias, attachment disorders, and anxiety<sup>7,12</sup>.

Reducing vulnerability is a way to protect children in disasters<sup>13</sup>. Susceptibility of children to injury and their dependency to others for lifesaving, livelihood, decision making, and emotional support results in their vulnerability<sup>13</sup>. Children are more likely to suffer from exposure to traumatic events because of their physical, physiological, and mental characteristics and development<sup>13 14</sup>. They are more likely vulnerable to challenges like malnutrition, dehydration, and exhaustion compared to adult<sup>13</sup>. As such, they need more protection before, during, and after disasters. Such protection are even more crucial for children who are more vulnerable by virtue of their age (i.e. infants), living conditions (e.g., bad infrastructure or lack of family support),

1  
2  
3 ethnicity, disabilities, chronic diseases or preconditions. Attention to children before disasters  
4 should be an integrated with disaster's preparedness programs<sup>13</sup>.  
5  
6

7 The distribution of climate-related disaster's risks is not similar for all children<sup>15</sup>. Intersecting  
8 social characteristics (e.g., gender, ethnicity, or social class), climate change vulnerabilities (e.g.),  
9 and health vulnerabilities (e.g., disability or chronic diseases such as diabetes) will influence the  
10 risk and intensity of disasters among children. Climate change including frequent heatwaves,  
11 extreme weather conditions and poor crop yields, exacerbates risk factors for child health due to  
12 influencing disease transmission rate, affordability of food, and more conflict on food resources<sup>16</sup>.  
13 The mentioned risk factor also exacerbate with social inequalities such as income, social status,  
14 gender, residence, location, housing, disability, and access to health care<sup>16,17</sup>. As a result, climate-  
15 related disasters could increase inequalities and as such health outcomes among children<sup>16</sup>.  
16  
17  
18  
19  
20  
21  
22

### 23 **Climate-related disasters' mitigation and adaptation**

24  
25  
26 Efforts to reduce or prevent climate-related hazards such as reducing or preventing greenhouse gas  
27 emissions are defined as mitigation<sup>12</sup>. It is necessary for mitigation to use renewable energy,  
28 increasing efficiency of energy in older equipment, and changing consumer behavior<sup>12</sup>.  
29  
30

31 Children can be agents of behavioral change for climate change mitigation. As the future leaders  
32 at local, national, and international level, they can help to reduce vulnerabilities in families and  
33 communities and transfer knowledge to their community<sup>18</sup>. It was shown that children's  
34 capabilities as agents are determined by their available resources and their environment  
35 capabilities (caregivers, parents, friend, peers, teachers, and community)<sup>19,20</sup>. Parents have a key  
36 role in changing children 'behavior with activities such as: training children on environmental  
37 ethics and mitigation strategies, buying green or environmentally friendly products for children,  
38 and modeling of pro-environmental behavior<sup>18</sup>. Laswon et al. (2019) showed that children can  
39 inspire adults especially their parents toward higher levels of climate concerns<sup>21</sup>.  
40  
41  
42  
43  
44  
45  
46

47  
48 Moreover, children can advocate for climate change mitigation. There are several examples of  
49 advocacy action of children and youth around the world, including seven young Portuguese appeal  
50 to the European Court of Human Rights to force 47 European countries to stop further extraction  
51 of fossil fuels following fires in Portugal in 2017<sup>22</sup>, fifteen years old Greta Thunberg in August  
52 2018, asked the Swedish government for more activities on climate change, and more. Following  
53  
54  
55  
56  
57  
58  
59  
60

1  
2  
3 Greta Thunberg's move, millions of children in cities around the world demonstrated climate  
4 change<sup>23</sup>. In the long term, participating children in climate change mitigation's programs leading  
5 to fewer disasters and, consequently, less risk to children's health. In other words, children can  
6 contribute to the health of children of different generations and be safe from the disasters caused  
7 by climate change.  
8  
9

### 10 11 12 **Children's preparedness for climate-related disasters** 13

14  
15 As long as government policies fail to fully address the drivers of climate-related disasters,  
16 disaster's preparedness and education for children should be considered for protection of children  
17 from disaster's risks. Preparedness is "the knowledge and capacity developed by governments,  
18 response and recovery organizations, communities, and individuals to effectively anticipate,  
19 respond to, and recover from the impacts of likely, imminent, or current disasters"<sup>24</sup>. The  
20 behavioral changes that lead to a child's preparedness for disasters depend more than anything  
21 upon two factors: increased knowledge and skills & risk perception.  
22  
23  
24  
25  
26

27  
28 The first factor in shaping children's behavior and response to disaster is knowledge and  
29 education<sup>25</sup>. Disaster education plays a major role in enhancing the awareness of children about  
30 disasters<sup>25</sup>. With an increase in children's awareness on disasters, they can share their knowledge  
31 with adults and it may result in adults' preparedness as well<sup>26</sup>. Disaster education for children can  
32 be conducted in schools, kindergartens, child welfare centers, or other child service centers.  
33 Schools play a critical role in disaster risk reduction because they facilitate the process of education  
34 of children on disaster risk reduction<sup>27</sup>. By utilizing appropriate policy framework, skilled teachers,  
35 textbook and curriculum for learning as well as peer education, schools provide an ideal space for  
36 children disaster's preparedness<sup>27</sup>.  
37  
38  
39  
40  
41  
42

43  
44 The second factor related to children's preparedness is risk perception. Risk perceptions are  
45 defined as "beliefs about potential harm or the possibility of loss. It is a subjective judgment that  
46 people make about the characteristics and severity of a risk"<sup>28</sup>. When a child perceived likelihood,  
47 susceptibility, and severity of a disaster (such as earthquake), then s/he would be able and willing  
48 to learn how to prepare<sup>28</sup>. For example, risk perception during COVID\_19 pandemic in the world  
49 was higher than any other hazard. Therefore, people actively explored and learned protective  
50 measures.  
51  
52  
53  
54  
55  
56  
57  
58  
59  
60

Before COVID-19 pandemic, there were many programs conducted for preparing children in many countries. It is shown some examples in the Table 1. Most of the examples in various countries were conducted in schools.

*Table 1: some examples of Successful programs for children in climate-related disasters' preparedness countries*

| Country     | Successful programs for climate-related disasters' preparedness                                                                                                                                                                                                                                     |
|-------------|-----------------------------------------------------------------------------------------------------------------------------------------------------------------------------------------------------------------------------------------------------------------------------------------------------|
| Cuba        | National program for preparing children for hurricanes through early warning education, evacuation education, enhancing health literacy and awareness, national media active role in hurricane education and early warning, and teaching risk-prone area to people including children <sup>29</sup> |
| New Zealand | Shakeout drill (emergency evacuation) <sup>30</sup> , The What's the Plan, Stan?, a voluntary, curriculum-based teaching resource for children disaster's preparedness <sup>31</sup> , museum-based hazard education program on students, teachers and parents <sup>32</sup> ;                      |
| USA         | Shake out drill in schools and communities( drop, cover and hold on" drills for earthquakes and evacuation for tsunamis) <sup>32-34</sup>                                                                                                                                                           |
| Turkey      | National program that was titled 'Are We Prepared for a disaster?' for children <sup>25</sup>                                                                                                                                                                                                       |
| Israel      | Disaster education with lecture and drills for children <sup>35</sup> , Light search and rescue training of high school students in Israel <sup>36,37</sup>                                                                                                                                         |
| Portugal    | Using the disaster awareness game for enhancing disaster's preparedness, curriculum-based teaching resource, interactive resources <sup>38,39</sup>                                                                                                                                                 |
| Indonesia   | National school based disaster education (lecture, drill, curriculum) <sup>40</sup>                                                                                                                                                                                                                 |
| Chile       | National disaster's education through drills for evacuation for major disasters, such as earthquakes and tsunamies <sup>41</sup>                                                                                                                                                                    |
| Iran        | programs for children about first aid skills, evacuation drills, curriculum-based teaching resource for disasters education <sup>42</sup>                                                                                                                                                           |
| Japan       | Tsunami preparedness via evacuation drills <sup>43</sup> , disaster management drill, firefighting frill, acquiring skill of rescue and first aid, and curriculum-based teaching resource <sup>44</sup>                                                                                             |

### **Innovative solutions for preparing children for climate-related disasters**

1  
2  
3 There are several ways to prepare children for climate-related disasters, besides traditional school-  
4 based methods such as lecture, curriculum, and drills. There was shown that isolated school-based  
5 programs increase disaster knowledge, but behavioral change is not forthcoming<sup>45</sup>. Virtual reality  
6 (VR) is a tool to facilitate disaster education and preparedness for children that its effectiveness  
7 was proved in many studies<sup>46-48</sup>. This tool could be used for evacuation drills<sup>46,49</sup>, firefighting  
8 drills<sup>50</sup>, first aid skills<sup>51</sup>, and other needed skills for disasters' preparedness. Moreover, children  
9 with disabilities cannot participate in physical drills for climate- related disasters. The VR tools  
10 eliminate this inequity and help children with disabilities such as children with hearing  
11 impairment<sup>52</sup>, and children with autism spectrum<sup>53</sup> to prepare for disasters.

12  
13  
14  
15  
16  
17  
18  
19  
20  
21  
22  
23  
24  
25  
26  
27  
28  
29  
30  
31  
32  
33  
34  
35  
36  
37  
38  
39  
40  
41  
42  
43  
44  
45  
46  
47  
48  
49  
50  
51  
52  
53  
54  
55  
56  
57  
58  
59  
60  
Simulation games are another way to prepare children in different ages for disasters<sup>54</sup>. These games  
can be available via mobile devices and computers<sup>55</sup>. The effectiveness of simulation games for  
disasters' preparedness was proved in different studies and for different climate-related disasters  
such as flood<sup>55,56</sup>, hurricane<sup>57</sup>, and earthquake<sup>58</sup>. This way preparedness is affordable, accessible,  
and available for many children around the world and will decrease inequity in health and disasters'  
preparedness and social inclusion of groups at risk of social exclusion<sup>59,60</sup>.

The Art such as storytelling are other effective ways to prepare children for climate-related  
disasters<sup>61</sup> and safety teaching<sup>62</sup>. This tool is effective especially for preschool children<sup>63</sup>. It was  
shown that climate-related disasters' education can improve the quality of preschools children  
knowledge<sup>64</sup>. Disasters' education with art can effectively help preschool children to participate in  
disasters climate mitigation and disasters' preparedness activities<sup>64</sup>. Researchers in a systematic  
review found that programs designed for children 5-11 years old should have some characteristics  
including the involvement of children's parents, using behavioral modalities (rather than  
cognitive), and using interactive methods (play, art, stories, and games)<sup>65</sup>. In addition, it was  
recommended to prepared children with disabilities for disasters with art such as storytelling<sup>66,67</sup>.

To prepare children for climate-related disasters in the time of pandemics, we recommend that:

- 1- Disasters education for children has so far relied mostly on offline training with physical  
activities such as drills. During this pandemic, different innovative approaches have been  
applied to continuing education in online formats. The same approaches could be applied  
for emergency preparedness. For example, virtual forums are appropriate alternatives to



1  
2  
3 provide educations on different topics, e.g., first aid or preparedness for earthquakes,  
4 floods, and other disasters.  
5

- 6  
7 2- The family and the community play a key role in empowering the child to prepare for  
8 climate-related disasters especially in the absence of schools, kindergartens, and other child  
9 care facilities.  
10  
11 3- Creating required resources, especially interactive resources, for disaster preparedness is  
12 another way to prepare children in different languages especially children 5-11 years old.  
13 Countries according to their risk map (hazard-prone places) should produce relevant  
14 content and resources for children.  
15  
16 4- Increasing the children's risk perception with the help of media such as TV programs, video  
17 games, physical games, music, storytelling, and simulators.  
18  
19 5- Capacity building to train the people around the children including teachers, parents,  
20 extended family members, nurses, school drivers, or care providers. Upon the shutdown of  
21 many centers, it is the best time to train people who work with children about disasters'  
22 preparedness. It can be very useful especially when COVID-19 threat has been removed.  
23  
24 6- Preparing marginalized children for disasters is vital. Intersection of childhood and racial  
25 and ethnic social class, disability, gender, and residence inequalities increases vulnerability  
26 and therefore increases disasters' risk for children. One should note that entry points for  
27 intervention in such situations are social vulnerabilities.  
28  
29 7- An advocacy support by influential entities such as companies engaged in entertainment  
30 industry is required for raising the awareness of public and particularly the children about  
31 disasters' preparedness.  
32  
33  
34  
35  
36  
37  
38  
39  
40  
41  
42  
43  
44  
45  
46  
47  
48

**Twitter:** @seddighi\_hamed, @M\_Lopez\_RUG

**Contributors:** HS undertook planning, writing up and was responsible for the overall content; SY, MLL, and HS provided content and writing of sections, HS provided content, and editorial oversight.  
49  
50  
51  
52  
53  
54  
55  
56  
57  
58  
59  
60

1  
2  
3 **Funding** The authors have not declared a specific grant for this research from any funding  
4 agency in the public, commercial, or not-for-profit sectors.  
5  
6

7 **Competing interests:** Not applicable.  
8  
9

10 **Patient and public involvement:** Not applicable.  
11

12 **Patient consent for publication:** Not applicable.  
13  
14  
15  
16  
17  
18  
19  
20  
21  
22  
23  
24  
25  
26  
27  
28  
29  
30  
31  
32  
33  
34  
35  
36  
37  
38  
39  
40  
41  
42  
43  
44  
45  
46  
47  
48  
49  
50  
51  
52  
53  
54  
55  
56  
57  
58  
59  
60

## References

- 1 Seddighi H. Trust in Humanitarian Aid From the Earthquake in 2017 to COVID-19 in Iran: A Policy Analysis. *Disaster Medicine and Public Health Preparedness*. 2020:1-4.
- 2 WMO. *WMO Statement on the State of the Global Climate in 2018*. World Meteorological Organization;2019.
- 3 AghaKouchak A, Huning LS, Chiang F, et al. How do natural hazards cascade to cause disasters? : Nature Publishing Group; 2018.
- 4 CRED. Disaster General Classification. <https://www.emdat.be/classification>. Accessed 31 March, 2020.
- 5 Seddighi H. COVID-19 as a Natural Disaster: Focusing on Exposure and Vulnerability for Response. *Disaster Medicine and Public Health Preparedness*.1-4.
- 6 Wallemacq P. *Economic losses, poverty & disasters: 1998-2017*. Centre for Research on the Epidemiology of Disasters, CRED; 2018.
- 7 Kousky C. Impacts of natural disasters on children. *The Future of Children*. 2016:73-92.
- 8 Seddighi H, Salmani I, Javadi MH, Seddighi S. Child abuse in natural disasters and conflicts: a systematic review. *Trauma, Violence & Abuse*.1524838019835973.
- 9 Wood LCN. Child modern slavery, trafficking and health: a practical review of factors contributing to children's vulnerability and the potential impacts of severe exploitation on health. *BMJ Paediatrics Open*. 2020;4(1):e0003.27
- 10 Sheffield PE, Landrigan PJ. Global climate change and children's health: threats and strategies for prevention. *Environmental health perspectives*. 2011;119(3):291-298.
- 11 Seddighi H, Sajjadi H, Salmani I. Child-Friendly Humanitarian Logistics in Natural Disasters: A Letter to the Editor. *Iranian Red Crescent Medical Journal*.21(8).
- 12 Burke SEL, Sanson AV, Van Hoorn J. The Psychological Effects of Climate Change on Children. *Current Psychiatry Reports*. 2018;20(5):35.
- 13 Hoffman S. Preparing for disaster: Protecting the most vulnerable in emergencies. *UC Davis L Rev*. 2008;42:1491.
- 14 Swenson CC, Saylor CF, Powell MP, Stokes SJ, Foster KY, Belter RW. Impact of a natural disaster on preschool children: Adjustment 14 months after a hurricane. *American Journal of Orthopsychiatry*. 1996;66(1):122-130.
- 15 Chalupka S, Anderko L, Pennea E. Climate Change, Climate Justice, and Children's Mental Health: A Generation at Risk? *Environmental Justice*. 2020;13(1):10-14.
- 16 Bennett CM, Friel S. Impacts of climate change on inequities in child health. *Children*. 2014;1(3):461-473.
- 17 Font-Ribera L, García-Continente X, Davó-Blanes MC, et al. [The study of social inequalities in child and adolescent health in Spain]. *Gac Sanit*. 2014;28(4):316-325.
- 18 Nche GC, Achunike HC, Okoli AB. From climate change victims to climate change actors: The role of eco-parenting in building mitigation and adaptation capacities in children. *The Journal of Environmental Education*. 2019;50(2):131-144.
- 19 Yousefzadeh S, Biggeri M, Arciprete C, Haisma H. A capability approach to child growth. *Child Indicators Research*. 2019;12(2):711-731.
- 20 Haisma H, Yousefzadeh S, Van Hensbroek PB. Towards a capability approach to child growth: A theoretical framework. *Maternal & Child Nutrition*..(2)14;2018

- 1  
2  
3 .21 Lawson DF, Stevenson KT, Peterson MN, Carrier SJ, L. Strnad R, Seekamp E. Children can foster  
4 climate change concern among their parents. *Nature Climate Change*. 2019;9(6):458-462.  
5  
6 .22 Burke SE, Sanson AV, Van Hoorn J. The psychological effects of climate change on children.  
7 *Current psychiatry reports*. 2018;20(5):35.  
8  
9 .23 Kristof V. Marching for climate and youth's future. *BMJ Paediatrics Open*. 2019;3(1):e000477.  
10  
11 .24 UNISDR U. Terminology on disaster risk reduction. *Geneva, Switzerland*. 2009  
12  
13 .25 Mermer G, Donmez RO, Daghan S. The evaluation of the education for earthquake preparation  
14 addressed to middle school students. *JPMA. The Journal of the Pakistan Medical Association*.  
15 2018;68(12):1809-1815.  
16  
17 .26 Sakurai A, Bisri M, Oda T, Oktari R, Murayama Y, Affan M. Exploring minimum essentials for  
18 sustainable school disaster preparedness: A case of elementary schools in Banda Aceh City,  
19 Indonesia. *International journal of disaster risk reduction*. 2018;29:73-83.  
20  
21 .27 Bandecchi AE, Pazzi V, Morelli S, Valori L, Casagli N. Geo-hydrological and seismic risk awareness  
22 at school: Emergency preparedness and risk perception evaluation. *International Journal of*  
23 *Disaster Risk Reduction*. 2019:101280.  
24  
25 .28 Darker C. Risk Perception. In: Gellman MD, Turner JR, eds. *Encyclopedia of Behavioral Medicine*.  
26 New York, NY: Springer New York; 2013:1689-1691.  
27  
28 .29 Miranda DS, Choonara I. Hurricanes and child health: lessons from Cuba. *Archives of disease in*  
29 *childhood*. 2011;96(4):328-329.  
30  
31 .30 Finnis KK, Johnston DM, Ronan KR, White JD. Hazard perceptions and preparedness of Taranaki  
32 youth. *Disaster Prevention and Management: An International Journal*. 2010.  
33  
34 .31 Johnson VA, Ronan KR, Johnston DM, Peace R. Implementing disaster preparedness education in  
35 New Zealand primary schools. *Disaster Prevention and Management*. 2014.  
36  
37 .32 MacDonald E, Johnson V, Gillies M, Johnston D. The impact of a museum-based hazard  
38 education program on students, teachers and parents. *International journal of disaster risk*  
39 *reduction*. 2017;21:360-366.  
40  
41 .33 Johnson VA. *An impact evaluation of ShakeOut, an earthquake and tsunami drill in two coastal*  
42 *Washington state school districts*. GNS Science; 2013.  
43  
44 .34 Jones LM, Benthien M. Preparing for a "Big One": the great southern California ShakeOut.  
45 *Earthquake Spectra*. 2011;27(2):575-595.  
46  
47 .35 Soffer Y, Goldberg A, Avisar-Shohat G, Cohen R, Bar-Dayan Y. The effect of different educational  
48 interventions on schoolchildren's knowledge of earthquake protective behaviour in Israel.  
49 *Disasters*. 2010;34(1):205-213.  
50  
51 .36 Bodas M, Peleg K, Shenhar G, Adini B. Light search and rescue training of high school students in  
52 Israel—Longitudinal study of effect on resilience and self-efficacy. *International journal of*  
53 *disaster risk reduction*. 2019;36:101089.  
54  
55 .37 Peleg K, Bodas M, Shenhar G, Adini B. Wisdom of (using) the crowds: Enhancing disasters  
56 preparedness through public training in Light Search and Rescue. *International journal of*  
57 *disaster risk reduction*. 2018;31:750-757.  
58  
59 .38 Delicado A, Rowland J, Fonseca S, de Almeida AN, Schmidt L, Ribeiro AS. Children in disaster risk  
60 reduction in Portugal: Policies, education, and (non) participation. *International Journal of*  
*Disaster Risk Science*. 2017;8(3):246-257.  
61  
62 .39 Ribeiro AS, Silva I. Drawing on fire: children's knowledge and needs after a wildfire disaster in  
63 Portugal. *Children's Geographies*. 2019:1-13.  
64  
65 .40 Adiyoso W, Kanegae H. The effect of different disaster education programs on tsunami  
66 preparedness among schoolchildren in Aceh, Indonesia. *Disaster Mitigation of Cultural Heritage*  
*and Historic Cities*. 2012;6(1):165-172.

- 1  
2  
3  
4  
5  
6  
7  
8  
9  
10  
11  
12  
13  
14  
15  
16  
17  
18  
19  
20  
21  
22  
23  
24  
25  
26  
27  
28  
29  
30  
31  
32  
33  
34  
35  
36  
37  
38  
39  
40  
41  
42  
43  
44  
45  
46  
47  
48  
49  
50  
51  
52  
53  
54  
55  
56  
57  
58  
59  
60
- .41 Vásquez A, Marinkovic K, Bernales M, León J, González J, Castro S. Children's views on evacuation drills and school preparedness: Mapping experiences and unfolding perspectives. *International Journal of Disaster Risk Reduction*. 2018;28:165-175.
- .42 Parsizadeh F, Ghafory-Ashtiany M. Iran public education and awareness program and its achievements. *Disaster Prevention and Management: An International Journal*. 2010;19(1):32-47.
- .43 Katada T, Kanai M. Implementation of Tsunami Disaster Education for Children and Their Parents at Elementary School. *Solutions to Coastal Disasters 2008*2008:39-48.
- .44 Shiwaku K, Shaw R. Disaster Resilience of Education Systems. *Disaster Risk Reduction*. 2016.
- .45 Codreanu TA, Celenza A, Jacobs I. Does Disaster Education of Teenagers Translate into Better Survival Knowledge, Knowledge of Skills, and Adaptive Behavioral Change? A Systematic Literature Review. *Prehospital and Disaster Medicine*. 2014;29(6):629-642.
- .46 Ooi S, Tanimoto T, Sano M. Virtual reality fire disaster training system for improving disaster awareness. Paper presented at: Proceedings of the 2019 8th International Conference on Educational and Information Technology2019.
- .47 Smith SJ, Farra SL, Ulrich DL, Hodgson E, Nicely S, Mickle A. Effectiveness of two varying levels of virtual reality simulation. *Nursing education perspectives*. 2018;39(6):E10-E15.
- .48 Feng Z, González VA, Amor R, Lovreglio R, Cabrera-Guerrero G. Immersive virtual reality serious games for evacuation training and research: A systematic literature review. *Computers & Education*. 2018;127:252-266.
- .49 KIM D-Y, HUH J-R, LEE J-D, BHANG K-J. Implementation of virtual reality for interactive disaster evacuation training using close-range image information. *Journal of the Korean Association of Geographic Information Studies*. 2019;22(1):140-153.
- .50 McAdoo BG, White T, Chen Y, Scollay A. Virtual Reality for Disaster Resilience (VR4DR). *AGUFM*. 2019;2019:IN21B-09.
- .51 Bucher K, Blome T, Rudolph S, von Mammen S. VReanimate II: training first aid and reanimation in virtual reality. *Journal of Computers in Education*. 2019;6(1):53-78.
- .52 Caballero AR, Niguidula JD, Caballero JM. Disaster Risk Management Training Simulation for People with Hearing Impairment: A Design and Implementation of ASL Assisted Model Using Virtual Reality. Paper presented at: 2019 4th International Conference on Information Technology (InCIT)2019.
- .53 Fino R, Lin MJ, Caballero A, Balahadia FF. Disaster awareness simulation for children with autism spectrum disorder using android virtual reality. *Journal of Telecommunication, Electronic and Computer Engineering (JTEC)*. 2017;9(2-6):59-62.
- .54 Savova D. AR Sandbox In Educational Programs For Disaster. Paper presented at: 6th International Conference on Cartography and GIS2016.
- .55 Tsai M-H, Wen M-C, Chang Y-L, Kang S-C. Game-based education for disaster prevention. *AI & society*. 2015;30(4):463-475.
- .56 Tsai M-H, Chang Y-L, Kao C, Kang S-C. The effectiveness of a flood protection computer game for disaster education. *Visualization in Engineering*. 2015;3(1):9.
- .57 Abraham B, Jayemanne D. Where are all the climate change games? Locating digital games' response to climate change. *Transformations*. 2017.
- .58 Chou Y-S, Hou H-T, Yu M-C, et al. Running Tommy©: Developing a digital adventure game based on situated learning to promote learners' concepts of earthquake escape. Paper presented at: 2012 IEEE Fourth International Conference On Digital Game And Intelligent Toy Enhanced Learning2012.

- 1  
2  
3 .59 Stewart J, Bleumers L, Van Looy J, et al. The potential of digital games for empowerment and  
4 social inclusion of groups at risk of social and economic exclusion: evidence and opportunity for  
5 policy. *Joint Research Centre, European Commission*. 2013.  
6 .60 Gampell A, Gaillard J, Parsons M, De LL. Fostering student participation in disaster risk reduction  
7 through disaster video games. *Australian Journal of Emergency Management, The*.  
8 2020;35(2):43.  
9 .61 Mangione GR, Pierri A, Capuano N. Emotion-based digital storytelling for risk education:  
10 Empirical evidences from the ALICE project. *International Journal of Continuing Engineering*  
11 *Education and Life Long Learning* 6. 2014;24(2):184-211.  
12 .62 Rae A. Tales of disaster: The role of accident storytelling in safety teaching. *Cognition,*  
13 *Technology & Work*. 2016;18(1):1-10.  
14 .63 Hidayati Y. Disaster Risk Reduction Education through Storytelling for Pre-School Children: A  
15 Case Study of Storytellers' Local Community in Lombok, West Nusa Tenggara. Paper presented  
16 at: International Conference on Early Childhood Education and Parenting 2009 (ECEP 2019)2020.  
17 .64 Proulx K, Aboud F. Disaster risk reduction in early childhood education: Effects on preschool  
18 quality and child outcomes. *International Journal of Educational Development*. 2019;66:1-7.  
19 .65 Brigden A, Parslow RM, Linney C, et al. How are behavioural interventions delivered to children  
20 (5–11 years old): a systematic mapping review. *BMJ Paediatrics Open*. 2019;3(1):e000543.  
21 .66 Giagazoglou P, Papadaniil M. Effects of a Storytelling Program with Drama Techniques to  
22 Understand and Accept Intellectual Disability in Students 6-7 Years Old. A Pilot Study. *Advances*  
23 *in Physical Education*. 2018;8(2):224-237.  
24 .67 Indriasari FN, Widyarani L, Kusuma PD. Emergency Preparedness for Children with Autism  
25 Spectrum Disorder (ASD) in Yogyakarta. *Jurnal Keperawatan Soedirman*. 2018;13(3):155-162.  
26  
27  
28  
29  
30  
31  
32  
33  
34  
35  
36  
37  
38  
39  
40  
41  
42  
43  
44  
45  
46  
47  
48  
49  
50  
51  
52  
53  
54  
55  
56  
57  
58  
59  
60

# BMJ Paediatrics Open

## Preparing children for climate-related disasters

|                               |                                                                                                                                                                                                                             |
|-------------------------------|-----------------------------------------------------------------------------------------------------------------------------------------------------------------------------------------------------------------------------|
| Journal:                      | <i>BMJ Paediatrics Open</i>                                                                                                                                                                                                 |
| Manuscript ID                 | bmjpo-2020-000833.R2                                                                                                                                                                                                        |
| Article Type:                 | Review                                                                                                                                                                                                                      |
| Date Submitted by the Author: | 28-Sep-2020                                                                                                                                                                                                                 |
| Complete List of Authors:     | Seddighi, Hamed; University of Social Welfare and Rehabilitation Science,<br>Yousefzadeh, Sepideh; RUG, Campus Friesland<br>Lopez, Monica; RUG<br>Sajjadi, Homeira; University of Social Welfare and Rehabilitation Science |
| Keywords:                     | Health services research, Adolescent Health, Information Technology                                                                                                                                                         |
|                               |                                                                                                                                                                                                                             |

SCHOLARONE™  
Manuscripts



I, the Submitting Author has the right to grant and does grant on behalf of all authors of the Work (as defined in the below author licence), an exclusive licence and/or a non-exclusive licence for contributions from authors who are: i) UK Crown employees; ii) where BMJ has agreed a CC-BY licence shall apply, and/or iii) in accordance with the terms applicable for US Federal Government officers or employees acting as part of their official duties; on a worldwide, perpetual, irrevocable, royalty-free basis to BMJ Publishing Group Ltd ("BMJ") its licensees and where the relevant Journal is co-owned by BMJ to the co-owners of the Journal, to publish the Work in this journal and any other BMJ products and to exploit all rights, as set out in our [licence](#).

The Submitting Author accepts and understands that any supply made under these terms is made by BMJ to the Submitting Author unless you are acting as an employee on behalf of your employer or a postgraduate student of an affiliated institution which is paying any applicable article publishing charge ("APC") for Open Access articles. Where the Submitting Author wishes to make the Work available on an Open Access basis (and intends to pay the relevant APC), the terms of reuse of such Open Access shall be governed by a Creative Commons licence – details of these licences and which [Creative Commons](#) licence will apply to this Work are set out in our licence referred to above.

Other than as permitted in any relevant BMJ Author's Self Archiving Policies, I confirm this Work has not been accepted for publication elsewhere, is not being considered for publication elsewhere and does not duplicate material already published. I confirm all authors consent to publication of this Work and authorise the granting of this licence.



## Preparing children for climate-related disasters

Hamed Seddighi <sup>1\*</sup>, Sepideh Yousefzadeh<sup>2</sup>, Mónica López López<sup>3</sup>, Homeira Sajjadi <sup>4</sup>

<sup>1</sup> Student Research Committee, University of Social Welfare and Rehabilitation Sciences, Tehran, Iran, [Hseddighi@gmail.com](mailto:Hseddighi@gmail.com)

<sup>2</sup> University Campus Fryslân, University of Groningen, the Netherlands, [s.yousefzadeh@rug.nl](mailto:s.yousefzadeh@rug.nl)

<sup>3</sup> Faculty of Behavioural and Social Sciences, University of Groningen, Groningen, the Netherlands, [m.lopez.lopez@rug.nl](mailto:m.lopez.lopez@rug.nl)

<sup>4</sup> Social Determinants of Health Research Center, University of Social Welfare and Rehabilitation Sciences, Tehran, Iran, [safaneh\\_s@yahoo.com](mailto:safaneh_s@yahoo.com)

**Corresponding author:** Hamed Seddighi, Iran, Tehran, University of Social Welfare and Rehabilitation Sciences, Kodakyar Ave., Daneshjo Blvd., 1985713871 (e-mail: [Hseddighi@gmail.com](mailto:Hseddighi@gmail.com) and [ha.seddighi@uswr.ac.ir](mailto:ha.seddighi@uswr.ac.ir)), Telefax: +983538213598

**Keywords:** Child, Safety, Climate Change, Disaster Planning

**Word counts:** 2000

## Abstract

Climate-related disasters affect different dimensions of children's health and wellbeing both directly and indirectly. Reducing children's vulnerability and exposure to climate-related disasters is crucial to protect them against risks. Children as climate-change agents and future leaders at local, national, and international level can obviously contribute to reduce vulnerabilities in families and communities and transfer knowledge to them. Moreover, children can advocate for climate change mitigation. In the long term, participation of children in climate change mitigation programs may lead to fewer disasters and, consequently, less risk to their health.

As government policies have failed to fully address and respond to the drivers of climate-related disasters, disaster's preparedness and education for children should be considered an essential activity to protect children from disaster's risks.

Main factors in shaping children's behavior and response to disaster are increasing the risk perception and knowledge of the children. When a child perceived likelihood, susceptibility, and severity of a disaster (such as earthquake), then they would be able and willing to learn how to prepare for that.

So far, disaster education programs for children have mostly relied on offline school-based training. Different innovative approaches can be applied to continue education within online and digital formats including virtual reality, digital games, and online platforms. However, an advocacy support by influential entities such as companies engaged in entertainment industry is required to raise the awareness of public and particularly the children about disaster preparedness.

### Key messages

1. With the rise of climate-related disasters, children's health is increasingly at risk.
2. Children should be involved in climate change mitigation programs.
3. Disaster preparedness programs should be developed to include all children with different conditions according to their social vulnerabilities and exposures and without discrimination.
4. It must be ensured that available disaster preparedness programs actually lead to disaster preparedness for children.
5. In addition to traditional disaster education programs for children, new and innovative methods should be widely used.
6. Involvement of various stakeholders such as family, community, government, civic institutions, and industries (including the entertainment industry) is essential in protecting children from disasters.

### Children, vulnerability and disasters

Anthropogenic climate change has led to more frequent natural disasters affecting more people in the past few decades<sup>1,2</sup>. Climate-related disasters such as floods, storms, droughts, and heat waves accounted for 91% of total disasters between 1998 and 2017. Climate-related disasters are strongly coupled and act as dominos. For example, drought and heat wave occur together. Drought leads to dry soils and as a result, solar energy evaporation will end to increase surface warming and consequent increased evaporation rate<sup>3</sup>. Drought and heatwave will increase the risk of wildfires. Furthermore, sandstorms, haze, and water conflicts are other consequences of drought. Disasters are classified into geophysical, hydrological, climatological, meteorological, biological, and technological based on their causes<sup>4,5</sup>. According to the Centre for Research on the Epidemiology of Disaster<sup>6</sup>, a disaster is a “situation or event that overwhelms local capacity, necessitating a request at the national or international level for external assistance; an unforeseen and often sudden event that causes great damage, destruction and human suffering”.

Children are one of the most vulnerable groups in situations of climate-related disasters and disasters have different impacts on children including fatalities, injuries, child trafficking, child labor, separation, and child abuse in different forms<sup>7-9</sup>. Disasters affect different dimensions of children’s health and wellbeing both directly and indirectly. Children under five years experienced more diseases related to climate change than others<sup>10</sup>. Children’s physical health is in danger as they may be injured or killed immediately during or after disasters due to trauma, malnourishment, diseases, and inadequate access to medical care<sup>7,11</sup>. Disasters also can lead to mental health problems in children, including depression, sleep disorders, phobias, attachment disorders, and anxiety<sup>7,12</sup>.

While parents, caregivers and the state have primary responsibility to protect children in the face of disasters, reducing children’s vulnerability is an important way to protect children in disasters<sup>13</sup>. Susceptibility of children to injury and their dependency to others for lifesaving, livelihood, decision making, and emotional support results in their vulnerability<sup>13</sup>. Children are more likely to suffer from exposure to traumatic events because of their physical, physiological, and mental characteristics and development<sup>13 14</sup>. They are more likely vulnerable to challenges like malnutrition, dehydration, and exhaustion compared to adult<sup>13</sup>. As such, they need more protection before, during, and after disasters. Such protections are even more crucial for children

1  
2  
3 who are more vulnerable by virtue of their age (i.e. infants), living conditions (e.g., bad  
4 infrastructure or lack of family support), ethnicity, disabilities, chronic diseases or preconditions.  
5 Attention to children before disasters should be an integrated with disaster's preparedness  
6 programs<sup>13</sup>.  
7  
8  
9

10 The distribution of climate-related disaster's risks is not similar for all children<sup>15</sup>. Intersecting  
11 social characteristics (e.g., gender, ethnicity, or social class), climate change vulnerabilities  
12 (e.g.), and health vulnerabilities (e.g., disability or chronic diseases such as diabetes) will  
13 influence the risk and intensity of disasters among children. Climate change including frequent  
14 heatwaves, extreme weather conditions and poor crop yields, exacerbates risk factors for child  
15 health due to influencing disease transmission rate, affordability of food, and more conflict on  
16 food resources<sup>16</sup>. The mentioned risk factors also exacerbate with social inequalities such as  
17 income, social status, gender, residence, location, housing, disability, and access to health  
18 care<sup>16,17</sup>. As a result, climate-related disasters could increase inequalities and as such health  
19 outcomes among children<sup>16</sup>.  
20  
21  
22  
23  
24  
25  
26  
27

### 28 **Climate-related disasters' mitigation and adaptation**

29  
30  
31 Efforts to reduce or prevent climate-related hazards such as reducing or preventing greenhouse  
32 gas emissions are defined as mitigation<sup>12</sup>. It is necessary for mitigation to use renewable energy,  
33 increasing efficiency of energy in older equipment, and changing consumer behavior<sup>12</sup>.  
34  
35  
36

37 Depending on their age, and levels of development children can be agents of behavioral change  
38 for climate change mitigation. As the future leaders at local, national, and international level,  
39 they can help to reduce vulnerabilities in families and communities and transfer knowledge to  
40 their community<sup>18</sup>. It was shown that children's capabilities as agents are determined by their  
41 available resources and their environment (caregivers, parents, friend, peers, teachers, and  
42 community)<sup>19,20</sup>. Parents have a key role in changing children 'behavior with activities such as:  
43 training children on environmental ethics and mitigation strategies, buying green or  
44 environmentally friendly products for children, and modeling of pro-environmental behavior<sup>18</sup>.  
45  
46  
47  
48  
49  
50  
51  
52  
53  
54  
55  
56  
57  
58  
59  
60

1  
2  
3 Children can advocate for climate change mitigation. There are several examples of advocacy  
4 action of children and youth around the world, including seven young Portuguese appeal to the  
5 European Court of Human Rights to force 47 European countries to stop further extraction of  
6 fossil fuels following fires in Portugal in 2017<sup>22</sup>, fifteen years old Greta Thunberg in August  
7 2018, asked the Swedish government for more activities on climate change, and more. Following  
8 Greta Thunberg's move, millions of children in cities around the world demonstrated climate  
9 change<sup>23</sup>. In the long term, participating children in climate change mitigation's programs leading  
10 to fewer disasters and, consequently, less risk to children's health. In other words, children can  
11 contribute to the health of children of different generations and be safe from the disasters caused  
12 by climate change.  
13  
14  
15  
16  
17  
18  
19  
20

### 21 **Children's preparedness for climate-related disasters**

22  
23 As long as government policies fail to fully address the drivers of climate-related disasters,  
24 disaster's preparedness and education for children should be considered for protection of children  
25 from disaster's risks. The preparedness interventions, need to be considered in relation to the  
26 evolving capacities of the child. In other words, the age, levels of abilities as well as cognitive  
27 and physical development of the child are crucial components in the discourse of disaster  
28 preparedness for children and cannot be taken for granted. Preparedness is "the knowledge and  
29 capacity developed by governments, response and recovery organizations, communities, and  
30 individuals to effectively anticipate, respond to, and recover from the impacts of likely,  
31 imminent, or current disasters"<sup>24</sup>. The behavioral changes that lead to a child's preparedness for  
32 disasters depend more than anything upon two factors: increased knowledge and skills & risk  
33 perception.  
34  
35  
36  
37  
38  
39  
40  
41  
42

43 The first factor in shaping children's behavior and response to disaster is knowledge and  
44 education<sup>25</sup>. Disaster education plays a major role in enhancing the awareness of children about  
45 disasters<sup>25</sup>. With an increase in children's awareness on disasters, they can share their knowledge  
46 with adults and it may result in adults' preparedness as well<sup>26</sup>. Disaster education for children can  
47 be conducted in schools, kindergartens, child welfare centers, or other child service centers.  
48 Schools play a critical role in disaster risk reduction because they facilitate the process of  
49 education of children on disaster risk reduction<sup>27</sup>. By utilizing appropriate policy framework,  
50 skilled teachers, textbook and curriculum for learning as well as peer education, schools provide  
51  
52  
53  
54  
55  
56  
57  
58  
59  
60

an ideal space for children disaster's preparedness<sup>27</sup>. Children's opportunities to access these sources of education are crucial factors. Their access could be simply by the lack of resources such as school, teacher, daycare or the financial means to access them. The access could also be constrained in the presence of resources. For example, child's gender, social class or ethnic background could be some of the hurdles to utilize the existing resources.

The second factor related to children's preparedness is risk perception. Risk perceptions are defined as "beliefs about potential harm or the possibility of loss. It is a subjective judgment that people make about the characteristics and severity of a risk"<sup>28</sup>. When a child perceived likelihood, susceptibility, and severity of a disaster (such as earthquake), then they would be able and willing to learn how to prepare<sup>28</sup>. For example, risk perception during COVID\_19 pandemic in the world was higher than any other hazard. Therefore, people actively explored and learned protective measures.

Before COVID-19 pandemic, there were many programs conducted for preparing children in many countries. It is shown some examples in the Table 1. Most of the examples in various countries were conducted in schools.

*Table 1: some examples of Successful programs for children in climate-related disasters' preparedness countries*

| Country   | Successful programs for climate-related disasters' preparedness                                                                                                                                                                                                                                       |
|-----------|-------------------------------------------------------------------------------------------------------------------------------------------------------------------------------------------------------------------------------------------------------------------------------------------------------|
| Chile     | National disaster's education through drills for evacuation for major disasters, such as earthquakes and tsunamies <sup>29</sup> .                                                                                                                                                                    |
| Cuba      | National program for preparing children for hurricanes through early warning education, evacuation education, enhancing health literacy and awareness, national media active role in hurricane education and early warning, and teaching risk-prone area to people including children <sup>30</sup> . |
| Indonesia | National school based disaster education (lecture, drill, curriculum) <sup>31</sup> .                                                                                                                                                                                                                 |
| Iran      | Programs for children about first aid skills, evacuation drills, curriculum-based teaching resource for disasters education <sup>32</sup> .                                                                                                                                                           |
| Israel    | Disaster education with lecture and drills for children <sup>33</sup> , light search and rescue training of high school students in Israel <sup>34,35</sup> .                                                                                                                                         |

|             |                                                                                                                                                                                                                                                                                |
|-------------|--------------------------------------------------------------------------------------------------------------------------------------------------------------------------------------------------------------------------------------------------------------------------------|
| Japan       | Tsunami preparedness via evacuation drills <sup>36</sup> , disaster management drill, firefighting drill, acquiring skill of rescue and first aid, and curriculum-based teaching resource <sup>37</sup> .                                                                      |
| New Zealand | Shakeout drill (emergency evacuation) <sup>38</sup> , The What's the Plan, Stan?, a voluntary, curriculum-based teaching resource for children disaster's preparedness <sup>39</sup> , museum-based hazard education program on students, teachers and parents <sup>40</sup> . |
| Portugal    | Using the disaster awareness game for enhancing disaster's preparedness, curriculum-based teaching resource, interactive resources <sup>41,42</sup> .                                                                                                                          |
| Turkey      | National program that was titled 'Are We Prepared for a disaster?' for children <sup>25</sup>                                                                                                                                                                                  |
| USA         | Shake out drill in schools and communities (drop, cover and hold on" drills for earthquakes and evacuation for tsunamis) <sup>40,43,44</sup> .                                                                                                                                 |

### **Innovative solutions for preparing children for climate-related disasters**

There are several ways to prepare children for climate-related disasters, besides traditional school-based methods such as lecture, curriculum, and drills. There was shown that isolated school-based programs increase disaster knowledge, but behavioral change is not forthcoming<sup>45</sup>. Virtual reality (VR) is a tool to facilitate disaster education and preparedness for children that its effectiveness was proved in many studies<sup>46-48</sup>. This tool could be used for evacuation drills<sup>46,49</sup>, firefighting drills<sup>50</sup>, first aid skills<sup>51</sup>, and other needed skills for disasters' preparedness. Moreover, children with disabilities cannot participate in physical drills for climate-related disasters. The VR tools eliminate this inequity and help children with disabilities such as children with hearing impairment<sup>52</sup>, and children with autism spectrum<sup>53</sup> to prepare for disasters.

Simulation games are another way to prepare children in different ages for disasters<sup>54</sup>. These games can be available via mobile devices and computers<sup>55</sup>. The effectiveness of simulation games for disasters' preparedness was proved in different studies and for different climate-related disasters such as flood<sup>55,56</sup>, hurricane<sup>57</sup>, and earthquake<sup>58</sup>. This way preparedness is affordable, accessible, and available for many children around the world and will decrease inequity in health and disasters' preparedness and social inclusion of groups at risk of social exclusion<sup>59,60</sup>.



1  
2  
3 The Art is another effective way to prepare children for climate-related disasters<sup>61</sup> and safety  
4 teaching<sup>62</sup>. This tool is effective especially for preschool children<sup>63</sup>. It was shown that climate-  
5 related disasters' education can improve the quality of preschools children knowledge<sup>64</sup>.  
6 Disasters' education with art can effectively help preschool children to participate in disasters  
7 climate mitigation and disasters' preparedness activities<sup>64</sup>. Researchers in a systematic review  
8 found that programs designed for children 5-11 years old should have some characteristics  
9 including the involvement of children's parents, using behavioral modalities (rather than  
10 cognitive), and using interactive methods (play, art, stories, and games)<sup>65</sup>. In addition, it was  
11 recommended to prepared children with disabilities for disasters with art and storytelling<sup>66,67</sup>.  
12  
13  
14  
15  
16  
17  
18

19 To prepare children for climate-related disasters in the time of pandemics, we recommend that:  
20  
21

- 22 1- Disasters education for children has so far relied mostly on offline training with physical  
23 activities such as drills. During this pandemic, different innovative approaches have been  
24 applied to continuing education in online formats. The same approaches could be applied  
25 for emergency preparedness. For example, virtual forums are appropriate alternatives to  
26 provide educations on different topics, e.g., first aid or preparedness for earthquakes,  
27 floods, and other disasters.  
28
- 29 2- Children should be involved in climate change mitigation programs. They can be agents  
30 of climate change mitigation and advocate for that. Their participation will change the  
31 behavior of families and communities and will also have intergenerational effects.  
32
- 33 3- The family and the community play a key role in empowering the child to prepare for  
34 climate-related disasters especially in the absence of schools, kindergartens, and other  
35 child care facilities.  
36
- 37 4- Creating required resources, especially interactive resources, for disaster preparedness  
38 and removing the constraints to utilize those researches are other ways to prepare  
39 children in different languages especially children 5-11 years old. Countries according to  
40 their risk map (hazard-prone places) should produce relevant content and resources for  
41 children.  
42
- 43 5- Children's risk perception should be increased with the help of media such as TV  
44 programs, video games, physical games, music, storytelling, and simulators.  
45  
46  
47  
48  
49  
50  
51  
52  
53  
54  
55  
56  
57  
58  
59  
60

- 6- Capacity building to train the people around the children including teachers, parents, extended family members, nurses, school drivers, or care providers. Upon the shutdown of many centers, it is the best time to train people who work with children about disasters' preparedness. It can be very useful especially when COVID-19 threat has been removed.
- 7- Preparing marginalized children for disasters is vital. Intersection of childhood and racial and ethnic social class, disability, gender, and residence inequalities increases vulnerability and therefore increases disasters' risk for children. One should note that entry points for intervention in such situations are social vulnerabilities.
- 8- An advocacy support by influential entities such as companies engaged in entertainment industry is required for raising the awareness of public and particularly the children about disasters' preparedness.
- 9- Local and community oriented policies should be crafted to reach out to parents of younger children, providing them with tools and resources, education and opportunities to prepare themselves and strengthen their capacities to protect their children during the disasters

**Twitter:** @seddighi\_hamed, @M\_Lopez\_RUG

**Contributors:** HS undertook planning, writing up and was responsible for the overall content; SY, MLL, and HS provided content and writing of sections, HS provided content, and editorial oversight.

**Funding** The authors have not declared a specific grant for this research from any funding agency in the public, commercial, or not-for-profit sectors.

**Competing interests:** Not applicable.

**Patient and public involvement:** Not applicable.

**Patient consent for publication:** Not applicable.

## References

- .1 Seddighi H. The performance of the Iranian Red Crescent by launching COVID-19 Testing Centers: Report from the field. *Disaster Medicine and Public Health Preparedness*. 2020:1-6.
- .2 WMO. *WMO Statement on the State of the Global Climate in 2018*. World Meteorological Organization;2019.
- .3 AghaKouchak A, Huning LS, Chiang F, et al. How do natural hazards cascade to cause disasters? : Nature Publishing Group; 2018.
- .4 CRED. Disaster General Classification. <https://www.emdat.be/classification>. Accessed 31 March, 2020.
- .5 Seddighi H. COVID-19 as a Natural Disaster: Focusing on Exposure and Vulnerability for Response. *Disaster Medicine and Public Health Preparedness*.1-4.
- .6 Wallemacq P. *Economic losses, poverty & disasters: 1998-2017*. Centre for Research on the Epidemiology of Disasters, CRED; 2018.
- .7 Kousky C. Impacts of natural disasters on children. *The Future of Children*. 2016:73-92.
- .8 Seddighi H, Salmani I, Javadi MH, Seddighi S. Child abuse in natural disasters and conflicts: a systematic review. *Trauma, Violence, & Abuse*.1524838019835973.
- .9 Wood LCN. Child modern slavery, trafficking and health: a practical review of factors contributing to children's vulnerability and the potential impacts of severe exploitation on health. *BMJ Paediatrics Open*. 202;(1)4;0e000327.
- .10 Sheffield PE, Landrigan PJ. Global climate change and children's health: threats and strategies for prevention. *Environmental health perspectives*. 2011;119(3):291-298.
- .11 Seddighi H, Sajjadi H, Salmani I. Child-Friendly Humanitarian Logistics in Natural Disasters: A Letter to the Editor. *Iranian Red Crescent Medical Journal*.21(8.(
- .12 Burke SEL, Sanson AV, Van Hoorn J. The Psychological Effects of Climate Change on Children. *Current Psychiatry Reports*. 2018;20(5):35.
- .13 Hoffman S. Preparing for disaster: Protecting the most vulnerable in emergencies. *UC Davis L. Rev*. 2008;42:1491.
- .14 Swenson CC, Saylor CF, Powell MP, Stokes SJ, Foster KY, Belter RW. Impact of a natural disaster on preschool children: Adjustment 14 months after a hurricane. *American Journal of Orthopsychiatry*. 1996;66(1):122-130.
- .15 Chalupka S, Anderko L, Pennea E. Climate Change, Climate Justice, and Children's Mental Health: A Generation at Risk? *Environmental Justice*. 2020;13(1):10-14.
- .16 Bennett CM, Friel S. Impacts of climate change on inequities in child health. *Children*. 2014;1(3):461-473.
- .17 Font-Ribera L, García-Continente X, Davó-Blanes MC, et al. [The study of social inequalities in child and adolescent health in Spain]. *Gac Sanit*. 2014;28(4):316-325.
- .18 Nche GC, Achunike HC, Okoli AB. From climate change victims to climate change actors: The role of eco-parenting in building mitigation and adaptation capacities in children. *The Journal of Environmental Education*. 2019;50(2):131-144.
- .19 Yousefzadeh S ,Biggeri M, Arciprete C, Haisma H. A capability approach to child growth. *Child Indicators Research*. 2019;12(2):711-731.
- .20 Haisma H, Yousefzadeh S, Van Hensbroek PB. Towards a capability approach to child growth: A theoretical framework. *Maternal & Child Nutrition*. 2018;14(2.(

- 1  
2  
3 .21 Lawson DF, Stevenson KT, Peterson MN, Carrier SJ, L. Strnad R, Seekamp E. Children can foster  
4 climate change concern among their parents. *Nature Climate Change*. 2019;9(6):458-462.  
5 .22 Burke SE, Sanson AV, Van Hoorn J. The psychological effects of climate change on children.  
6 *Current psychiatry reports*. 2018;20(5):35.  
7 .23 Kristof V. Marching for climate and youth's future. *BMJ Paediatrics Open*. 2019;3(1):e000477.  
8 .24 UNISDR U. Terminology on disaster risk reduction. *Geneva, Switzerland*. 2009.  
9 .25 Mermer G, Donmez RO, Daghan S. The evaluation of the education for earthquake preparation  
10 addressed to middle school students. *JPMA. The Journal of the Pakistan Medical Association*.  
11 2018;68(12):1809-1815.  
12 .26 Sakurai A, Bisri M, Oda T, Oktari R, Murayama Y, Affan M. Exploring minimum essentials for  
13 sustainable school disaster preparedness: A case of elementary schools in Banda Aceh City,  
14 Indonesia. *International journal of disaster risk reduction*. 2018;29:73-83.  
15 .27 Bandecchi AE, Pazzi V, Morelli S, Valori L, Casagli N. Geo-hydrological and seismic risk awareness  
16 at school: Emergency preparedness and risk perception evaluation. *International Journal of*  
17 *Disaster Risk Reduction*. 2019:101280.  
18 .28 Darker C. Risk Perception. In: Gellman MD, Turner JR, eds. *Encyclopedia of Behavioral Medicine*.  
19 New York, NY: Springer New York; 2013:1689-1691.  
20 .29 Vásquez A, Marinkovic K, Bernales M, León J, González J, Castro S. Children's views on  
21 evacuation drills and school preparedness: Mapping experiences and unfolding perspectives.  
22 *International Journal of Disaster Risk Reduction*. 2018;28:165-175.  
23 .30 Miranda DS, Choonara I. Hurricanes and child health: lessons from Cuba. *Archives of disease in*  
24 *childhood*. 2011;96(4):328-329.  
25 .31 Adiyoso W, Kanegae H. The effect of different disaster education programs on tsunami  
26 preparedness among schoolchildren in Aceh, Indonesia. *Disaster Mitigation of Cultural Heritage*  
27 *and Historic Cities*. 2012;6(1):165-172.  
28 .32 Parsizadeh F, Ghafory-Ashtiany M. Iran public education and awareness program and its  
29 achievements. *Disaster Prevention and Management: An International Journal*. 2010;19(1):32-  
30 47.  
31 .33 Soffer Y, Goldberg A, Avisar-Shohat G, Cohen R, Bar-Dayyan Y. The effect of different educational  
32 interventions on schoolchildren's knowledge of earthquake protective behaviour in Israel.  
33 *Disasters*. 2010;34(1):205-213.  
34 .34 Bodas M, Peleg K, Shenhar G, Adini B. Light search and rescue training of high school students in  
35 Israel—Longitudinal study of effect on resilience and self-efficacy. *International journal of*  
36 *disaster risk reduction*. 2019;36:101089.  
37 .35 Peleg K, Bodas M, Shenhar G, Adini B. Wisdom of (using) the crowds: Enhancing disasters  
38 preparedness through public training in Light Search and Rescue. *International journal of*  
39 *disaster risk reduction*. 2018;31:750-757.  
40 .36 Katada T, Kanai M. Implementation of Tsunami Disaster Education for Children and Their  
41 Parents at Elementary School. *Solutions to Coastal Disasters 2008*2008:39-48.  
42 .37 Shiwaku K, Shaw R. Disaster Resilience of Education Systems. *Disaster Risk Reduction*. 2016.  
43 .38 Finnis KK, Johnston DM, Ronan KR, White JD. Hazard perceptions and preparedness of Taranaki  
44 youth. *Disaster Prevention and Management: An International Journal*. 2010.  
45 .39 Johnson VA, Ronan KR, Johnston DM, Peace R. Implementing disaster preparedness education in  
46 New Zealand primary schools. *Disaster Prevention and Management*. 2014.  
47 .40 MacDonald E, Johnson V, Gillies M, Johnston D. The impact of a museum-based hazard  
48 education program on students, teachers and parents. *International journal of disaster risk*  
49 *reduction*. 2017;21:360-366.  
50  
51  
52  
53  
54  
55  
56  
57  
58  
59  
60

- 1  
2  
3  
4  
5  
6  
7  
8  
9  
10  
11  
12  
13  
14  
15  
16  
17  
18  
19  
20  
21  
22  
23  
24  
25  
26  
27  
28  
29  
30  
31  
32  
33  
34  
35  
36  
37  
38  
39  
40  
41  
42  
43  
44  
45  
46  
47  
48  
49  
50  
51  
52  
53  
54  
55  
56  
57  
58  
59  
60
- .41 Delicado A, Rowland J, Fonseca S, de Almeida AN, Schmidt L, Ribeiro AS. Children in disaster risk reduction in Portugal: Policies, education, and (non) participation. *International Journal of Disaster Risk Science*. 2017;8(3):246-257.
- .42 Ribeiro AS, Silva I. Drawing on fire: children's knowledge and needs after a wildfire disaster in Portugal. *Children's Geographies*. 2019:1-13.
- .43 Johnson VA. *An impact evaluation of ShakeOut, an earthquake and tsunami drill in two coastal Washington state school districts*. GNS Science; 2013.
- .44 Jones LM, Benthien M. Preparing for a "Big One": the great southern California ShakeOut. *Earthquake Spectra*. 2011;27(2):575-595.
- .45 Codreanu TA, Celenza A, Jacobs I. Does Disaster Education of Teenagers Translate into Better Survival Knowledge, Knowledge of Skills, and Adaptive Behavioral Change? A Systematic Literature Review. *Prehospital and Disaster Medicine*. 2014;29(6):629-642.
- .46 Ooi S, Tanimoto T, Sano M. Virtual reality fire disaster training system for improving disaster awareness. Paper presented at: Proceedings of the 2019 8th International Conference on Educational and Information Technology2019.
- .47 Smith SJ, Farra SL, Ulrich DL, Hodgson E, Nicely S, Mickle A. Effectiveness of two varying levels of virtual reality simulation. *Nursing education perspectives*. 2018;39(6):E10-E15.
- .48 Feng Z, González VA, Amor R, Lovreglio R, Cabrera-Guerrero G. Immersive virtual reality serious games for evacuation training and research: A systematic literature review. *Computers & Education*. 2018;127:252-266.
- .49 KIM D-Y, HUH J-R, LEE J-D, BHANG K-J. Implementation of virtual reality for interactive disaster evacuation training using close-range image information. *Journal of the Korean Association of Geographic Information Studies*. 2019;22(1):140-153.
- .50 McAdoo BG, White T, Chen Y, Scollay A. Virtual Reality for Disaster Resilience (VR4DR). *AGUFM*. 2019;2019:IN21B-09.
- .51 Bucher K, Blome T, Rudolph S, von Mammen S. VReanimate II: training first aid and reanimation in virtual reality. *Journal of Computers in Education*. 2019;6(1):53-78.
- .52 Caballero AR, Niguidula JD, Caballero JM. Disaster Risk Management Training Simulation for People with Hearing Impairment: A Design and Implementation of ASL Assisted Model Using Virtual Reality. Paper presented at: 2019 4th International Conference on Information Technology (InCIT)2019.
- .53 Fino R, Lin MJ, Caballero A, Balahadia FF. Disaster awareness simulation for children with autism spectrum disorder using android virtual reality. *Journal of Telecommunication, Electronic and Computer Engineering (JTEC)*. 2017;9(2-6):59-62.
- .54 Savova D. AR Sandbox In Educational Programs For Disaster. Paper presented at: 6th International Conference on Cartography and GIS2016.
- .55 Tsai M-H, Wen M-C, Chang Y-L, Kang S-C. Game-based education for disaster prevention. *AI & society*. 2015;30(4):463-475.
- .56 Tsai M-H, Chang Y-L, Kao C, Kang S-C. The effectiveness of a flood protection computer game for disaster education. *Visualization in Engineering*. 2015;3(1):9.
- .57 Abraham B, Jayemanne D. Where are all the climate change games? Locating digital games' response to climate change. *Transformations*. 2017.
- .58 Chou Y-S, Hou H-T, Yu M-C, et al. Running Tommy©: Developing a digital adventure game based on situated learning to promote learners' concepts of earthquake escape. Paper presented at: 2012 IEEE Fourth International Conference On Digital Game And Intelligent Toy Enhanced Learning2012.

- 1  
2  
3 .59 Stewart J, Bleumers L, Van Looy J, et al. The potential of digital games for empowerment and  
4 social inclusion of groups at risk of social and economic exclusion: evidence and opportunity for  
5 policy. *Joint Research Centre, European Commission*.2013 .  
6  
7 .60 Gampell A, Gaillard J, Parsons M, De LL. Fostering student participation in disaster risk reduction  
8 through disaster video games. *Australian Journal of Emergency Management, The*.  
9 2020;35(2):43.  
10 .61 Mangione GR, Pierri A, Capuano N. Emotion-based digital storytelling for risk education:  
11 Empirical evidences from the ALICE project. *International Journal of Continuing Engineering*  
12 *Education and Life Long Learning* 6. 2014;24(2):184-211.  
13 .62 Rae A. Tales of disaster: The role of accident storytelling in safety teaching. *Cognition,*  
14 *Technology & Work*. 2016;18(1):1-10.  
15 .63 Hidayati Y. Disaster Risk Reduction Education through Storytelling for Pre-School Children: A  
16 Case Study of Storytellers' Local Community in Lombok, West Nusa Tenggara. Paper presented  
17 at: International Conference on Early Childhood Education and Parenting 2009 (ECEP 2019)2020.  
18 .64 Proulx K, Aboud F. Disaster risk reduction in early childhood education: Effects on preschool  
19 quality and child outcomes. *International Journal of Educational Development*. 2019;66:1-7.  
20 .65 Brigden A, Parslow RM, Linney C, et al. How are behavioural interventions delivered to children  
21 (5–11 years old): a systematic mapping review. *BMJ Paediatrics Open*. 2019;3(1):e000543.  
22 .66 Giagazoglou P, Papadaniil M. Effects of a Storytelling Program with Drama Techniques to  
23 Understand and Accept Intellectual Disability in Students 6-7 Years Old. A Pilot Study. *Advances*  
24 *in Physical Education*. 2018;8(2):224-237.  
25 .67 Indriasari FN, Widyarani L, Kusuma PD. Emergency Preparedness for Children with Autism  
26 Spectrum Disorder (ASD) in Yogyakarta. *Jurnal Keperawatan Soedirman*. 2018;13(3):155-162.  
27  
28  
29  
30  
31  
32  
33  
34  
35  
36  
37  
38  
39  
40  
41  
42  
43  
44  
45  
46  
47  
48  
49  
50  
51  
52  
53  
54  
55  
56  
57  
58  
59  
60
